# Supplementary material
Source: publisher figshare collection journal article supplement (https://sage.figshare.com/ndownloader/files/17566298)
Supplement: Supplementary file 1 [file 17566298]

# Evaluating the Quality of Changes in Voter Registration Databases: Supplementary Materials

## 1 Acknowledgements

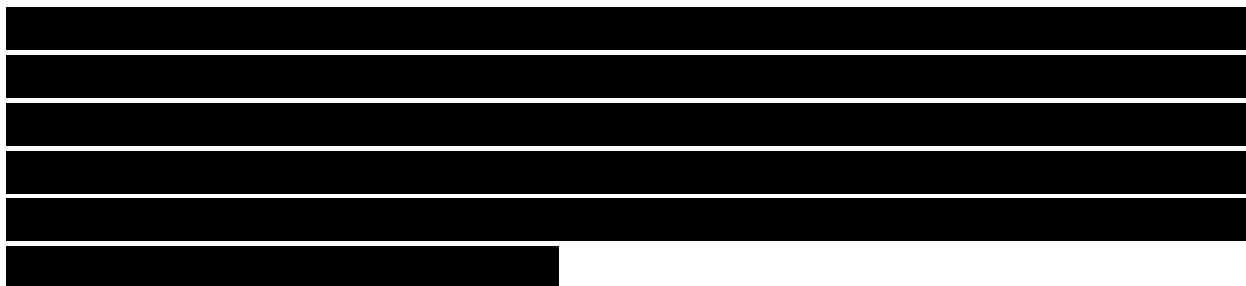

## 2 Data

### 2.1 Data Overview

In this paper, we investigate 252 unique daily snapshots of the Orange County Voter Registration dataset, beginning April 26, 2018, and ending May 24, 2019. Altogether, they cover 89% of business days (weekdays). Each snapshot consists of roughly 1.5 million voters. We continue to receive daily snapshots of the OC dataset in the 2020 cycle.

### 2.2 Why Orange County?

Orange County (California) is a large and diverse county in Southern California. Located south of Los Angeles and north of San Diego, Orange County is home to a wide array of different business, colleges and universities, and of course, Disneyland. The county currently has a total population of almost 3.2 million residents, and in the 2016 presidential election, Orange County had just over 2 million voting-eligible citizens, with approximately 1.5 million registered voters California Secretary of State (2016). In that same election, 1.2 million of those registered voters participated (80.7% of registered voters). Orange County's population is also diverse, as the U.S. Census Bureau's most recent estimates show that 72% of the county's population is White, 21% Asian, 2% African-American, and 3.5% two or more races. The Census Bureau's recent data estimates that 34% of the Orange County's population is Hispanic or Latino United States Census Bureau (2017). Thus, one reason we focus on Orange County for this study is that it is one of the largest and most diverse election jurisdictions in the United States.

Secondly, Orange County is widely viewed as an innovator in the administration of elections. The County’s Registrar of Voters, Neal Kelley, participates widely in state and national professional organizations, and is has been recognized for his innovative administrative practices. Under his administration, Orange County has developed many administrative processes and tools that are viewed as best practices for election administration. These innovations include, for example, building transparency by webcasting in real time virtually all aspects of the process of administering an election, or more recently, pilot testing risk-limiting audits.

## 2.3 Data Availability

Upon publication, all of the code necessary to produce the analyses reported in our paper will be available on the [GitHub](#) repository [\[REDACTED\]](#) along with an example dataset with synthetic voter information. Due to the confidential nature of the voter registration data, and our data access agreement with OCROV, we cannot share or post publicly the data used in this study. Researchers who want to use these data can request access from the Orange County Registrar of Voters.

## 2.4 Data Dictionary

The voter file “snapshots” that we have received from the OCROV contain the fields described below. The number in parentheses describe the number of unique values for each field,<sup>1</sup> based on the snapshot of May 21, 2018, the registration deadline for the June 2018 primaries. The snapshot consists of 1,478,541 observations.

Here we provide a data dictionary and the number of unique values in each of the sixty-two data fields.<sup>2</sup> Many of the variables are created internally by the Orange County Registrar of Voters for their usage; our interest is mostly limited to variables that contain direct inputs from the voters. These variables of interest are listed in the Appendix in Table 2 with summary statistics.<sup>3</sup> Although the Registrar assigns each voter with a unique ID (1VoterUniqueID) that is not duplicated in any of the daily snapshots, not all voters are distinct entities.

In Orange County, the voter registration forms ask the voter for both the California Driver’s License number (or a California Identification card number) and the last four digits of the Social Security Number (SSN) Orange County Registrar of Voters (2018b). However, these are not strictly

---

<sup>1</sup>The numbers are based on raw text, so that for instance, “MISS” and “Miss” are counted as distinct values.

<sup>2</sup>Note that the canonical text cleaning and standardizing precedes both the calculations of number of unique entries and the occurrence of the most frequent entries, such as stripping the string of non-alphanumeric entries, trimming white-spaces, and case normalizing, except for email addresses, which may be case sensitive and in which certain punctuation creates meaningful differences.

<sup>3</sup>We exclude mailing addresses due to the fact that it usually overlaps with physical, residential address. We also excluded reported place of birth as it seems to frequently be misreported, and the reported place of birth changes frequently in the data.

required. If neither of them can be provided, a voter may be assigned a unique ID number solely for registration purposes (Orange County Registrar of Voters, 2018a). Despite these seemingly unique identifiers, duplicates still can be found in the database. Indeed, deduplication based on exact matching on these identifiers—the most basic of deduplication efforts—is already performed by the OCROV.

- “lVoterUniqueID” (1,478,541): Internally assigned voter identification number.
- “sAffNumber” (1,478,540): An identifier of the voter registration affidavit.
- “szStateVoterID” (1): The voter identification number assigned by the Secretary of State’s Office to the record.
- “sVoterTitle” (10): Title (e.g., “Dr.”, “Mrs.”) provided by the voter.
- “szNameLast” (188,734): Last name.
- “szNameFirst” (89,985): First name.
- “szNameMiddle” (52,085): Middle name.
- “sNameSuffix” (23): Name suffix.
- “sGender” (3): Gender.
- “szSitusAddress” (787,043): Address.
- “szSitusCity” (48): City.
- “sSitusState” (1): State.
- “sSitusZip” (94): Zip Code.
- “sHouseNum” (30,269): House number.
- “sUnitAbbr” (20): House unit abbreviation.
- “sUnitNum” (14,780): House unit number.
- “szStreetName” (17,437): Street name.
- “sStreetSuffix” (95): Street suffix.
- “sPreDir” (9): Direction prefix.
- “sPostDir” (5): Direction suffix.
- “szMailAddress1” (807,272): Mailing address (street address).
- “szMailAddress2” (22,249): Mailing address (city, state, and zip code).
- “szMailAddress3” (2,271): Mailing address (overseas voters’ street address).
- “szMailAddress4” (195): Mailing address (overseas voters’ country of residence).
- “szMailZip” (13,425): Mailing Zip Code.
- “szPhone” (706,711): Telephone number.
- “szEmailAddress” (452,610): Email address.
- “dtBirthDate” (30,468): Date of birth.
- “sBirthPlace” (30,468): Place of birth.
- “dtRegDate” (15,762): Registration record date.
- “dtOrigRegDate” (16,477): Original registration date.

- “dtLastUpdate\_dt” (6,984): Update of record.
- “sStatusCode” (1): Status of record.
- “szStatusReasonDesc” (110): Description of record status.
- “sUserCode1” (7,370): (Unknown)
- “sUserCode2” (13): (Unknown)
- “iDuplicateIDFlag” (4): Potential duplicate ID flag.
- “szLanguageName” (1): Language.
- “szPartyName” (46): Party registration.
- “szAVStatusAbbr” (12): Absentee status abbreviation.
- “szAVStatusDesc” (12): Absentee status description.
- “szPrecinctName” (53): Precinct name.
- “sPrecinctID” (1,487): Precinct ID.
- “sPrecinctPortion” (8): Precinct portion.
- “sDistrictID\_0” (1): Geographic district identifier (0: County).
- “iSubDistrict\_0” (1): Geographic district (0: County).
- “szDistrictName\_0” (1): Geographic district name (0: County).
- “sDistrictID\_1” (7): Geographic district identifier (1: Congressional district).
- “iSubDistrict\_1” (1): Geographic district (1: Congressional district).
- “szDistrictName\_1” (7): Geographic district name (1: Congressional district).
- “sDistrictID\_2” (5): Geographic district identifier (2: Senate district).
- “iSubDistrict\_2” (1): Geographic district (2: Senate district).
- “szDistrictName\_2” (5): Geographic district name (2: Senate district).
- “sDistrictID\_3” (7): Geographic district identifier (3: Assembly district).
- “iSubDistrict\_3” (1): Geographic district (3: Assembly district).
- “szDistrictName\_3” (7): Geographic district name (3: Assembly district).
- “sDistrictID\_4” (5): Geographic district identifier (4: Supervisorial district).
- “iSubDistrict\_4” (1): Geographic district (4: Supervisorial district).
- “szDistrictName\_4” (5): Geographic district name (4: Supervisorial district).
- “sDistrictID\_5” (35): Geographic district identifier (5: City council ward division).
- “iSubDistrict\_5” (9): Geographic district (5: City council ward division).
- “szDistrictName\_5” (68): Geographic district name (5: City council ward division).

## 2.5 Hypothetical Changes to the Database

Figure 1 shows synthetic examples of changes in the voter file. They can also represent examples of duplicates in the file.

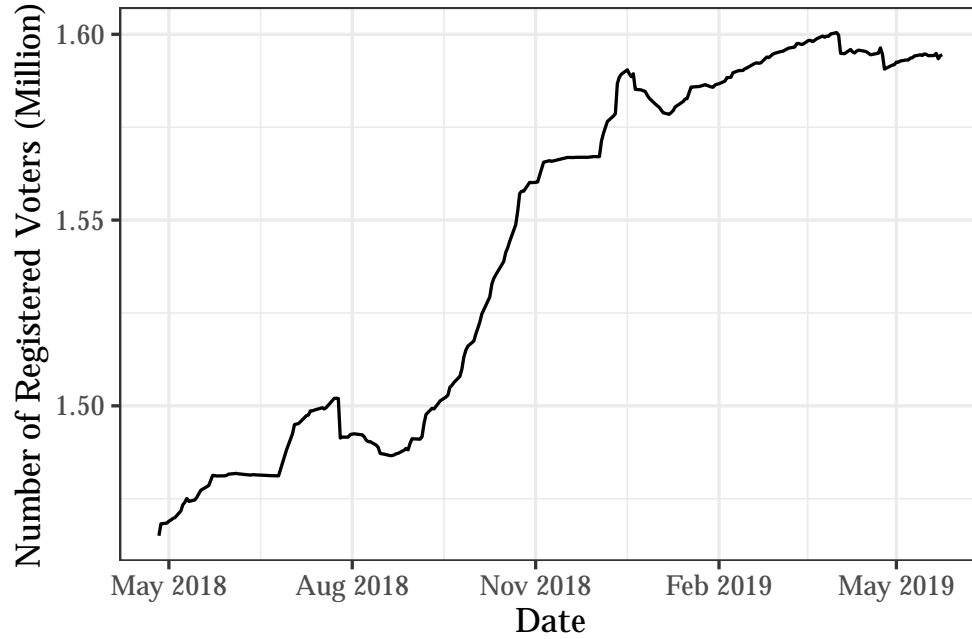

Figure 1: Number of Records Per Day

| First  | Name   |       | Address        |        | Birth Date | Phone        | Contact  |  |
|--------|--------|-------|----------------|--------|------------|--------------|----------|--|
|        | Middle | Last  | Street Address | City   |            |              | Email    |  |
| Steven | B      | Smith | 110 S East Ave | Brea   | 04/26/1980 | 714-765-3300 | N/A      |  |
| Steven |        | Smith | 110 S East Ave | Brea   | 04/26/1980 | 714-765-3300 | smith@ex |  |
| Isidor |        | Agnes | 99 6th St #72  | Tustin | 07/13/1960 | N/A          | N/A      |  |
| Jsidor |        | Agne  | 99 6th St #72  | Tustin | 07/13/1960 | 714-205-8583 | N/A      |  |
| Anna   | Clara  | Zhang | 203 Coast Ln   | Tustin | 12/01/1950 | N/A          | acz@ex   |  |
| Anna   | C      | Zhang | 101 Sunny Blvd | Brea   | 12/10/1950 | N/A          | acz@ex   |  |

Table 1: Synthetic Examples of Changes in Voter Files

## 2.6 Descriptive Statistics

Figure 1 show the total number of observations in the voter registration database by date. As can be seen, the daily snapshots were generated on business days (weekdays). There are a few missing snapshots—while the Orange County Registrar of Voters have made incredible contributions by providing us with daily snapshots, when they were busy, we were unable to obtain some snapshots.

In addition, as aforementioned, Table 2 shows the data summary for some important user-entered variables. This shows how data-intensive each field is, showing the amount of missing data for the important fields, and the number of unique and most frequent entries. For instance, the name suffix has too much missing data and too few unique entries to be very informative. Political party, although an important variable, is likewise not informative for matching.

Table 2: Data Summary by Field of May 21 Snapshot

| Category        | Field               | Number of Unique Entries | Number of Most Freq. Entry | Number Missing | Examples                  |
|-----------------|---------------------|--------------------------|----------------------------|----------------|---------------------------|
| Name            | First               | 89,984                   | 21,481                     | 78             | Jane                      |
|                 | Middle              | 51,609                   | 83,035                     | 406,428        | E                         |
|                 | Last                | 188,734                  | 26,385                     | 0              | Doe                       |
|                 | Title (Name Prefix) | 5                        | 466,043                    | 488,123        | Ms.                       |
|                 | Name Suffix         | 18                       | 16,430                     | 1,452,055      | Jr.                       |
| Address         | Street Address      | 786,224                  | 93                         | 0              | 1300 S Grand Ave Unit 101 |
|                 | City                | 48                       | 140,081                    | 0              | Santa Ana                 |
|                 | Zip Code            | 94                       | 40,128                     | 0              | 92705                     |
| Date of Birth   |                     | 30,467                   | 124                        | 23             | March 11, 1989            |
| Place of Birth  |                     | 319                      | 678,187                    | 60,999         | CA                        |
| Gender          |                     | 3                        | 2,274                      | 1,474,151      | F                         |
| Political Party |                     | 46                       | 540,859                    | 0              | No Party Preference       |
| Contact         | Phone               | 706,710                  | 9,035                      | 663,105        | (714) 567-7600            |
|                 | Email               | 452,609                  | 382                        | 1,018,894      | jane@roc.ocgov.com        |

## 3 Parameter and Variable Selection in Record Linkage

A recap of the probabilistic record linkage framework, which forms the basis of our analysis, is in Figure 2. The two density distributions show match probability by the latent status of a true match. If the match is a “true negative,” i.e, the entities are not the same voter, the match probability is likely lower than when the match is a “true positive.” However, due to chance, some fields such as names or address may coincide, resulting in an overlapping region. A researcher typically decides upon a lower and upper cutoff of the match probability to classify the record pairs into nonmatches, matches, and those that must be clerically reviewed. Note that for the final composite match probability, we have to calculate each fields’ agreement levels and weight it using its frequency

## Framework of Probabilistic Record Linkage

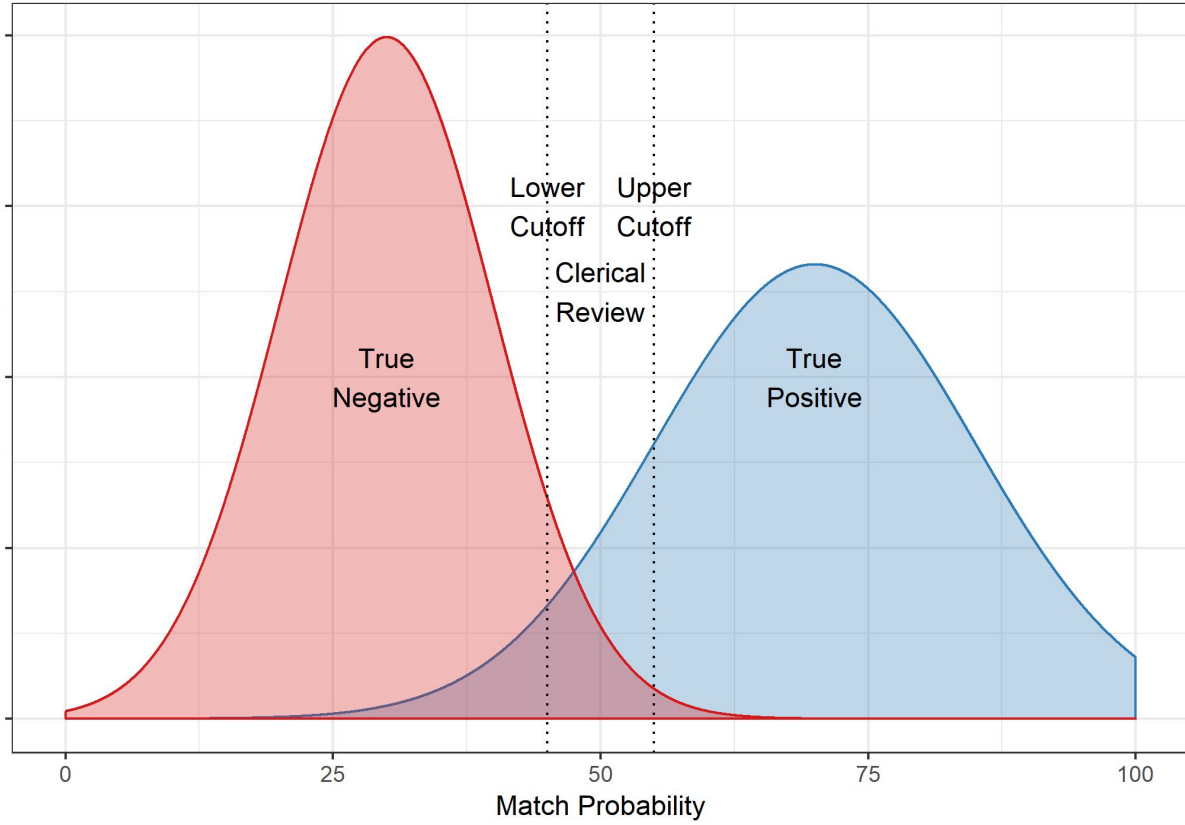

Figure 2: The Framework of Probabilistic Record Linkage

distribution.

### 3.1 String Distance Metrics and Threshold

In this Section we briefly explore how we chose the parameters in record linkage. As we have aforementioned in the main text, we use R and its CRAN package `fastLink`. While there are many different options in `fastLink`, the following are major parameters of choice: the choice of the string distance metric (`stringdist.method`), and the cutoff threshold that declares a match (`threshold.match`). The first determines the spectrum of the agreement between two strings. The second determines the lower cutoff for a match classification—that is, in Figure 2, we only use a single cutoff for simplicity, not leaving any records for clerical review.

The default values of each are respectively the Jaro-Winkler string distance metric and a threshold of 0.85. We test out the following combination of string metric-threshold parameters:

$$c(\text{Jaro-Winkler, Levenshtein distance}) \times c(0.70, 0.75, 0.80, 0.85, 0.90, 0.95)$$

While we do not have a gold standard—i.e., true match status—when matching between snapshots, we have a good alternative for it, which is the internal ID assigned within the OCROV. Assuming that it is the true match status, we can employ the following canonical performance measurements in record linkage: pairwise precision, pairwise recall, and F1 score. For details on the string distance measures and the performance metrics, refer to Christen (2012).

The followings are the performance matrices for the twelve parameter combinations, using the variables mentioned in the main text.

| No. | String Metric | Threshold | Precision | Recall | F1     |
|-----|---------------|-----------|-----------|--------|--------|
| 1   | Jaro-Winkler  | 0.70      | 0.9433    | 0.9939 | 0.9657 |
| 2   | Jaro-Winkler  | 0.75      | 0.9364    | 0.9970 | 0.9672 |
| 3   | Jaro-Winkler  | 0.80      | 0.9343    | 0.9970 | 0.9659 |
| 4   | Jaro-Winkler  | 0.85      | 0.9429    | 0.9873 | 0.9600 |
| 5   | Jaro-Winkler  | 0.90      | 0.9360    | 0.9972 | 0.9671 |
| 6   | Jaro-Winkler  | 0.95      | 0.9377    | 0.9937 | 0.9659 |
| 7   | Levenshtein   | 0.70      | 0.9386    | 0.9793 | 0.9514 |
| 8   | Levenshtein   | 0.75      | 0.9356    | 0.9623 | 0.9487 |
| 9   | Levenshtein   | 0.80      | 0.9306    | 0.9689 | 0.9427 |
| 10  | Levenshtein   | 0.85      | 0.9342    | 0.9970 | 0.9659 |
| 11  | Levenshtein   | 0.90      | 0.9397    | 0.9873 | 0.9671 |
| 12  | Levenshtein   | 0.95      | 0.9256    | 0.9524 | 0.9290 |

Table 3: Performance Evaluation for String Distance Metric and Threshold Choices

Note that because the internal ID may be inconsistent, some of the matches that are classified as false are true matches. There are no cases vice versa to our knowledge, i.e., cases where two people share the same internal voter ID. Hence pairwise precision is slightly undervalued, and as a result the F1 score. We still use F1 score as our final metric for tuning as it is a harmonic mean between precision and recall.

In the grid that we explored, it seems to be the case that the Jaro-Winkler string metric combined with a threshold value of 0.75 works best. Note that the threshold value of choice is lower than the default value in Enamorado et al. (2018). Also note that while 0.75 works best when the string distance metric is fixed to Jaro-Winkler, 0.90 works best when the metric is Levenshtein distance. When the threshold value is fixed at 0.85, Levenshtein distance performs better. While we have chosen optimal parameters, this also is a cautionary tale in applying record linkage in other datasets and other domains.

### 3.2 Variable Selection

Another choice that the researcher should make when employing probabilistic record linkage is to choose which variables to perform the matching on. This depends substantially on the dataset’s

existing variables and the dataset’s size. Our first intuition was the 7th combination of variables: first name, last name, date of birth, street number, and zip code. We test the performance for adding or deleting variables from this combination, using the tuned parameters from above.

| No. | Variables                                                                                | Precision | Recall | F1     |
|-----|------------------------------------------------------------------------------------------|-----------|--------|--------|
| 1   | First name, middle name, last name, date of birth, street number, zip code               | 0.9648    | 0.6237 | 0.7529 |
| 2   | First name, last name, date of birth, street number, street name, zip code               | 0.9383    | 0.8190 | 0.8744 |
| 3   | First name, last name, date of birth, street number, house number, zip code              | 0.9411    | 0.1864 | 0.3203 |
| 4   | First name, last name, date of birth, street number, street name, house number, zip code | 0.9366    | 0.1884 | 0.3206 |
| 5   | First name, last name, date of birth, full street address, zip code                      | 0.9354    | 0.8493 | 0.8874 |
| 6   | First name, last name, date of birth, gender, street number, zip code                    | 0.9432    | 0.9106 | 0.9264 |
| 7   | First name, last name, date of birth, street number, zip code                            | 0.9364    | 0.9970 | 0.9672 |
| 8   | First name, date of birth, street number, zip code                                       | 0.9219    | 0.9843 | 0.9593 |
| 9   | Last name, date of birth, street number, zip code                                        | 0.9313    | 0.9832 | 0.9605 |
| 10  | First name, last name, street number, zip code                                           | 0.9334    | 0.9595 | 0.9516 |
| 11  | First name, last name, date of birth, zip code                                           | 0.9361    | 0.9682 | 0.9542 |
| 12  | First name, last name, date of birth, street number                                      | 0.9361    | 0.9684 | 0.9654 |

Table 4: Performance Evaluation for Variable Choices

The initial combination of choice seems to be indeed most optimal in terms of the F1 score. The next-best choice seems to be using only the street number. Note that adding variables seem to cause much more damage by creating false negatives and decreasing the recall. Precision is relatively robust. Regardless, hence our choice of variables used to match snapshots is the seventh set of variables.

## 4 Duplication Detection

### 4.1 Setup

The cheapest duplicate detection methods are often exact matches that are *rule-based* Hernandez & Stolfo (1998), i.e., a researcher defines specifically what a match is—for instance, a match may be declared when first name, last name, date of birth, and residing city are exact matches. With fuzzy matches, we can reduce computational costs by *blocking* to reduce comparison pairs as aforementioned. However, the choice of rules or blocks both requires extensive “domain-specific expertise” as the literature puts it, which makes it difficult to automate the selection, and has room for arbitrary choices. The procedure here describes an automated measure to lessen this problem, but the initial choice of variables do need some knowledge about the data, as aforementioned in the main text.

We use a combination of two or three of the following variables:

- Last name
- First name

- Date of birth
- Residential address (part): Street number, street name, zip code
- Phone number
- Email address

In addition, we give the following variations: for all combinations with first names, generate blocks that substitute first name for gender, and for all combinations with address (part), generate blocks that substitute street number and street name for a full single string of street address, including directions and unit numbers. The rationale is that the OCROV data contains very little information in the existing gender field, so that gender is largely inferred from first names, given prefixes, and a few scattered entries of exiting ‘sGender’. Hence including both made little sense. The latter is motivated by the fact that apartment numbers are often missing and street directions as well (e.g. North, South, East, West). The full street address contains the parts of the addresses. Moreover, we include two blocks of single variables: address (part) and address (full). On the other hand, we leave out gender-last name block, because the blocks were too big and crashed the available computation resources when computed in a 320G memory.

This leaves us with seventy-one blocks to be tested. Generation of blocks were performed with CRAN package RecordLinkage, as at the beginning of the project, fastLink did not have the means to preprocessing matches via blocking. Table 5 shows the blocks aligned by reduction ratio. It also displays the key distribution statistics of the block sizes (the minimum is always 1), the number of blocks (i.e., unique values), and the number of non-missing occurrences.

Table 5: Cost Comparison for Blocks: Pre-Matching, April 26 Snapshot

| No. | Variables                                 | Non-missing<br>Obs. | Number of<br>Blocks | Block Size Distribution |    |    |     | Number of<br>Comparisons | Reduction<br>Ratio (%) |
|-----|-------------------------------------------|---------------------|---------------------|-------------------------|----|----|-----|--------------------------|------------------------|
|     |                                           |                     |                     | Q1                      | Q2 | Q3 | Max |                          |                        |
| 1   | First name, Date of birth, Email          | 30.7%               | 449,848             | 1                       | 1  | 1  | 2   | 8                        | 99.999999996           |
| 2   | First name, Date of birth, Phone          | 54.4%               | 797,257             | 1                       | 1  | 1  | 2   | 18                       | 99.999999992           |
| 3   | First name, Phone, Email                  | 22.3%               | 326,703             | 1                       | 1  | 1  | 2   | 19                       | 99.999999991           |
| 4   | Gender, Date of birth, Email              | 28.8%               | 421,535             | 1                       | 1  | 1  | 2   | 23                       | 99.999999989           |
| 5   | Date of birth, Phone, Email               | 22.3%               | 326,703             | 1                       | 1  | 1  | 2   | 26                       | 99.999999988           |
| 6   | Last name, Date of birth, Email           | 30.7%               | 449,839             | 1                       | 1  | 1  | 2   | 31                       | 99.999999986           |
| 7   | First name, Date of birth, Address (full) | 100.0%              | 1,464,891           | 1                       | 1  | 1  | 2   | 42                       | 99.999999980           |
| 8   | First name, Address (full), Email         | 30.7%               | 449,806             | 1                       | 1  | 1  | 2   | 55                       | 99.999999974           |
| 9   | First name, Date of birth, Address (part) | 99.9%               | 1,463,820           | 1                       | 1  | 1  | 2   | 56                       | 99.999999974           |
| 10  | Date of birth, Address (full), Email      | 30.7%               | 449,814             | 1                       | 1  | 1  | 2   | 56                       | 99.999999974           |
| 11  | Date of birth, Address (part), Email      | 30.7%               | 449,324             | 1                       | 1  | 1  | 2   | 57                       | 99.999999973           |
| 12  | Last name, First name, Email              | 30.7%               | 449,803             | 1                       | 1  | 1  | 2   | 58                       | 99.999999973           |
| 13  | First name, Address (part), Email         | 30.7%               | 449,314             | 1                       | 1  | 1  | 2   | 58                       | 99.999999973           |
| 14  | Date of birth, Email                      | 30.7%               | 449,802             | 1                       | 1  | 1  | 2   | 68                       | 99.999999968           |
| 15  | First name, Email                         | 30.7%               | 449,777             | 1                       | 1  | 1  | 2   | 84                       | 99.999999961           |
| 16  | Gender, Date of birth, Phone              | 51.1%               | 747,693             | 1                       | 1  | 1  | 2   | 215                      | 99.999999900           |
| 17  | Last name, First name, Date of birth      | 100.0%              | 1,464,693           | 1                       | 1  | 1  | 3   | 241                      | 99.999999888           |
| 18  | Last name, Date of birth, Phone           | 54.4%               | 797,014             | 1                       | 1  | 1  | 3   | 291                      | 99.999999864           |
| 19  | Date of birth, Address (full), Phone      | 54.4%               | 796,952             | 1                       | 1  | 1  | 3   | 353                      | 99.999999836           |
| 20  | Date of birth, Address (part), Phone      | 54.4%               | 796,366             | 1                       | 1  | 1  | 3   | 363                      | 99.999999831           |
| 21  | Gender, Phone, Email                      | 20.9%               | 305,835             | 1                       | 1  | 1  | 4   | 409                      | 99.999999809           |
| 22  | Date of birth, Phone                      | 54.4%               | 796,882             | 1                       | 1  | 1  | 3   | 423                      | 99.999999803           |
| 23  | Last name, Gender, Email                  | 28.8%               | 420,860             | 1                       | 1  | 1  | 4   | 734                      | 99.999999658           |
| 24  | Last name, First name, Phone              | 54.4%               | 796,522             | 1                       | 1  | 1  | 3   | 764                      | 99.999999644           |

|    |                                          |        |           |    |    |    |     |            |               |
|----|------------------------------------------|--------|-----------|----|----|----|-----|------------|---------------|
| 25 | First name, Address (full), Phone        | 54.4%  | 796,512   | 1  | 1  | 1  | 3   | 775        | 99.9999999639 |
| 26 | First name, Address (part), Phone        | 54.4%  | 795,919   | 1  | 1  | 1  | 3   | 792        | 99.9999999631 |
| 27 | First name, Phone                        | 54.4%  | 796,315   | 1  | 1  | 1  | 3   | 972        | 99.9999999547 |
| 28 | Gender, Address (full), Email            | 28.8%  | 420,590   | 1  | 1  | 1  | 7   | 1,035      | 99.9999999518 |
| 29 | Gender, Address (part), Email            | 28.7%  | 420,083   | 1  | 1  | 1  | 7   | 1,073      | 99.9999999500 |
| 30 | Gender, Email                            | 28.8%  | 420,377   | 1  | 1  | 1  | 7   | 1,269      | 99.9999999409 |
| 31 | Last name, Phone, Email                  | 22.3%  | 324,807   | 1  | 1  | 1  | 4   | 2,004      | 99.9999999066 |
| 32 | Gender, Date of birth, Address (full)    | 94.0%  | 1,375,275 | 1  | 1  | 1  | 4   | 2,024      | 99.9999999057 |
| 33 | Address (full), Phone, Email             | 22.3%  | 324,368   | 1  | 1  | 1  | 4   | 2,488      | 99.9999998841 |
| 34 | Address (part), Phone, Email             | 22.3%  | 323,943   | 1  | 1  | 1  | 4   | 2,543      | 99.9999998815 |
| 35 | Gender, Date of birth, Address (part)    | 93.9%  | 1,373,733 | 1  | 1  | 1  | 4   | 2,565      | 99.9999998805 |
| 36 | Phone, Email                             | 22.3%  | 324,214   | 1  | 1  | 1  | 4   | 2,670      | 99.9999998756 |
| 37 | Last name, Date of birth, Address (full) | 100.0% | 1,462,355 | 1  | 1  | 1  | 4   | 2,703      | 99.9999998741 |
| 38 | Last name, Date of birth, Address (part) | 99.9%  | 1,461,213 | 1  | 1  | 1  | 4   | 2,790      | 99.9999998700 |
| 39 | Date of birth, Address (full)            | 100.0% | 1,461,602 | 1  | 1  | 1  | 4   | 3,462      | 99.9999998387 |
| 40 | Last name, Address (full), Email         | 30.7%  | 445,404   | 1  | 1  | 1  | 4   | 4,673      | 99.9999997823 |
| 41 | Date of birth, Address (part)            | 99.9%  | 1,459,367 | 1  | 1  | 1  | 4   | 4,691      | 99.9999997814 |
| 42 | Last name, Address (part), Email         | 30.7%  | 444,829   | 1  | 1  | 1  | 4   | 4,765      | 99.9999997780 |
| 43 | Last name, Email                         | 30.7%  | 445,117   | 1  | 1  | 1  | 6   | 4,995      | 99.9999997673 |
| 44 | Address (full), Email                    | 30.7%  | 443,984   | 1  | 1  | 1  | 10  | 6,275      | 99.9999997076 |
| 45 | Address (part), Email                    | 30.7%  | 443,355   | 1  | 1  | 1  | 10  | 6,434      | 99.9999997002 |
| 46 | Last name, First name, Address (full)    | 100.0% | 1,457,666 | 1  | 1  | 1  | 3   | 7,325      | 99.9999996587 |
| 47 | Last name, First name, Address (part)    | 99.9%  | 1,456,258 | 1  | 1  | 1  | 4   | 7,690      | 99.9999996417 |
| 48 | First name, Address (full)               | 100.0% | 1,455,598 | 1  | 1  | 1  | 4   | 9,454      | 99.9999995595 |
| 49 | Last name, Gender, Phone                 | 51.1%  | 733,684   | 1  | 1  | 1  | 6   | 15,292     | 99.9999992875 |
| 50 | Gender, Address (full), Phone            | 51.1%  | 730,463   | 1  | 1  | 1  | 18  | 19,175     | 99.9999991066 |
| 51 | Gender, Address (part), Phone            | 51.0%  | 729,561   | 1  | 1  | 1  | 18  | 19,593     | 99.9999990871 |
| 52 | Last name, Gender, Date of birth         | 94.0%  | 1,358,093 | 1  | 1  | 1  | 16  | 21,173     | 99.9999990135 |
| 53 | Gender, Phone                            | 51.1%  | 724,976   | 1  | 1  | 1  | 18  | 25,344     | 99.9999988192 |
| 54 | First name, Address (part)               | 99.9%  | 1,434,127 | 1  | 1  | 1  | 17  | 41,618     | 99.9999980610 |
| 55 | Last name, Date of birth                 | 100.0% | 1,424,977 | 1  | 1  | 1  | 20  | 49,456     | 99.9999976958 |
| 56 | Last name, Address (full), Phone         | 54.4%  | 728,639   | 1  | 1  | 1  | 8   | 75,722     | 99.9999964720 |
| 57 | Last name, Address (part), Phone         | 54.4%  | 727,208   | 1  | 1  | 1  | 8   | 76,695     | 99.9999964267 |
| 58 | Last name, Phone                         | 54.4%  | 723,423   | 1  | 1  | 1  | 8   | 82,495     | 99.9999961565 |
| 59 | Address (full), Phone                    | 54.4%  | 710,824   | 1  | 1  | 1  | 30  | 98,511     | 99.9999954102 |
| 60 | Address (part), Phone                    | 54.4%  | 708,911   | 1  | 1  | 1  | 31  | 100,205    | 99.9999953313 |
| 61 | First name, Date of birth                | 100.0% | 1,348,674 | 1  | 1  | 1  | 8   | 138,931    | 99.9999935270 |
| 62 | Last name, Gender, Address (full)        | 94.0%  | 1,220,017 | 1  | 1  | 1  | 10  | 181,918    | 99.9999915242 |
| 63 | Last name, Gender, Address (part)        | 93.9%  | 1,209,649 | 1  | 1  | 1  | 42  | 203,839    | 99.9999905029 |
| 64 | Gender, Address (full)                   | 94.0%  | 1,100,303 | 1  | 1  | 1  | 65  | 348,869    | 99.9999837457 |
| 65 | Last name, Address (full)                | 100.0% | 1,010,761 | 1  | 1  | 2  | 11  | 619,849    | 99.9999711204 |
| 66 | Last name, Address (part)                | 99.9%  | 993,131   | 1  | 1  | 2  | 95  | 682,501    | 99.9999682014 |
| 67 | Address (full)                           | 100.0% | 783,022   | 1  | 2  | 2  | 94  | 1,049,036  | 99.9999511240 |
| 68 | Last name, First name                    | 100.0% | 1,129,285 | 1  | 1  | 1  | 278 | 2,598,749  | 99.9998789209 |
| 69 | Gender, Address (part)                   | 93.9%  | 901,372   | 1  | 1  | 2  | 418 | 5,779,992  | 99.9997307026 |
| 70 | Address (part)                           | 99.9%  | 596,116   | 1  | 2  | 3  | 691 | 13,091,823 | 99.9993900349 |
| 71 | Gender, Date of birth                    | 94.0%  | 58,985    | 13 | 25 | 33 | 65  | 20,016,417 | 99.9990674090 |

## 4.2 Assessing Blocks

We then calculate the potential match rate, false positive costs, and finally, after aligning the blocks by their costs, calculate the cumulative matches to do, as explained. The following Table 6 is a full version of the Table 2 in the main text.

Table 6: Cost Comparison for Blocks: Pre-Matching, April 26 Snapshot

| No. | Variables                        | Number of Comparisons | Match Rate | Cost | Cumulative Matches To-Do |
|-----|----------------------------------|-----------------------|------------|------|--------------------------|
| 1   | First name, Date of birth, Email | 8                     | 87.5%      | 0.00 | 8                        |
| 2   | First name, Date of birth, Phone | 18                    | 100.0%     | 0.00 | 23                       |
| 3   | First name, Phone, Email         | 19                    | 100.0%     | 0.00 | 39                       |

|    |                                           |        |        |        |         |
|----|-------------------------------------------|--------|--------|--------|---------|
| 4  | Gender, Date of birth, Email              | 23     | 95.7%  | 0.00   | 54      |
| 5  | First name, Date of birth, Address (full) | 42     | 100.0% | 0.00   | 91      |
| 6  | First name, Address (full), Email         | 55     | 100.0% | 0.00   | 128     |
| 7  | First name, Date of birth, Address (part) | 56     | 100.0% | 0.00   | 142     |
| 8  | Last name, First name, Email              | 58     | 98.3%  | 0.00   | 156     |
| 9  | First name, Address (part), Email         | 58     | 100.0% | 0.00   | 159     |
| 10 | Last name, First name, Date of birth      | 241    | 100.0% | 0.00   | 366     |
| 11 | First name, Address (full), Phone         | 775    | 99.9%  | 0.00   | 1,122   |
| 12 | First name, Address (part), Phone         | 792    | 99.9%  | 0.00   | 1,139   |
| 13 | Last name, First name, Address (full)     | 7,325  | 100.0% | 0.00   | 7,781   |
| 14 | Last name, First name, Address (part)     | 7,690  | 100.0% | 0.00   | 8,132   |
| 15 | Gender, Date of birth, Phone              | 215    | 97.7%  | 0.02   | 8,322   |
| 16 | Gender, Date of birth, Address (full)     | 2,024  | 99.8%  | 0.02   | 10,128  |
| 17 | Gender, Date of birth, Address (part)     | 2,565  | 99.8%  | 0.02   | 10,653  |
| 18 | Last name, Date of birth, Address (full)  | 2,703  | 99.9%  | 0.02   | 11,668  |
| 19 | Last name, Date of birth, Address (part)  | 2,790  | 99.9%  | 0.02   | 11,695  |
| 20 | First name, Email                         | 84     | 90.5%  | 0.04   | 11,701  |
| 21 | Date of birth, Address (full)             | 3,462  | 99.8%  | 0.04   | 12,123  |
| 22 | Date of birth, Address (part)             | 4,691  | 99.8%  | 0.04   | 12,784  |
| 23 | First name, Address (full)                | 9,454  | 99.7%  | 0.14   | 14,746  |
| 24 | Last name, Gender, Email                  | 734    | 90.3%  | 0.33   | 15,413  |
| 25 | Last name, First name, Phone              | 764    | 88.4%  | 0.41   | 15,533  |
| 26 | First name, Phone                         | 972    | 85.8%  | 0.63   | 15,578  |
| 27 | Gender, Phone, Email                      | 409    | 59.9%  | 0.75   | 15,738  |
| 28 | Gender, Address (full), Email             | 1,035  | 66.8%  | 1.58   | 15,975  |
| 29 | Gender, Address (part), Email             | 1,073  | 66.3%  | 1.66   | 15,991  |
| 30 | Gender, Email                             | 1,269  | 57.3%  | 2.49   | 16,085  |
| 31 | Last name, Gender, Phone                  | 15,292 | 87.5%  | 8.80   | 30,245  |
| 32 | Last name, Gender, Date of birth          | 21,173 | 84.9%  | 14.65  | 49,442  |
| 33 | Gender, Address (full), Phone             | 19,175 | 72.1%  | 24.55  | 55,284  |
| 34 | Gender, Address (part), Phone             | 19,593 | 71.7%  | 25.46  | 55,492  |
| 35 | Last name, Date of birth                  | 49,456 | 84.5%  | 35.21  | 82,730  |
| 36 | Gender, Phone                             | 25,344 | 58.4%  | 48.38  | 86,329  |
| 37 | First name, Address (part)                | 41,618 | 47.7%  | 100.00 | 118,109 |

## References

- California Secretary of State. (2016). *Voter registration statistics by county: Report of registration as of October 24, 2016*. Retrieved from <http://elections.cdn.sos.ca.gov/sov/2016-general/sov/02-voter-reg-stats-by-county.pdf>
- Christen, P. (2012). *Data matching: concepts and techniques for record linkage, entity resolution, and duplicate detection*. Springer Science & Business Media.
- Enamorado, T., Fifield, B., & Imai, K. (2018). Using a probabilistic model to assist merging of large-scale administrative records. *American Political Science Review*, 1–19.

Hernandez, M. A., & Stolfo, S. J. (1998). Real-world data is dirty: Data cleansing and the merge/purge problem. *Data Mining and Knowledge Discovery*, 2, 9-37.

Orange County Registrar of Voters. (2018a). *Citizenship & voting: Register to vote*. Retrieved from <http://www.ocgov.com/residents/voting/register>

Orange County Registrar of Voters. (2018b). *Register to vote, or change your name, address or party*. Retrieved from <https://www.ocvote.com/registration/register-to-vote/>

United States Census Bureau. (2017). *Quickfacts: Orange County, California*. Retrieved from <https://www.census.gov/quickfacts/fact/table/orangecountycalifornia/PST045217>
